# DNA checkpoints in fission yeast

Kanji Furuya and Antony M. Carr\*

MRC Cell Mutation Unit, University of Sussex, Falmer, Brighton, Sussex BN1 9RR, UK

\*Author for correspondence (e-mail: a.m.carr@sussex.ac.uk)

Journal of Cell Science 116, 3847-3848  
 © 2003 The Company of Biologists Ltd  
 doi:10.1242/jcs.00790

The DNA integrity checkpoints ensure completion of DNA replication and DNA repair before entry into mitosis (O'Connell et al., 2000). Unreplicated DNA or unrepaired DNA will cause catastrophic chromosome segregation. The accompanying schematic shows the checkpoint proteins that monitor the state of DNA replication and DNA repair.

Checkpoint proteins most probably interact with the replication complex (RC) during S phase (blue wedge) or with DNA strand breaks if they are induced during G2 phase (yellow wedge). These checkpoint proteins ultimately inactivate the Cdc2–cyclin-B kinase complex by inhibitory Tyr15 phosphorylation (O'Connell et al., 2000). High Cdc2–cyclin-B kinase activity allows the cell to enter mitosis (pink wedge), where chromosome separation and segregation occur (see bottom left, upper panel). Checkpoint activation thus causes cell cycle arrest in G2 phase (see bottom left, lower panel). Evolutionary conserved checkpoint proteins (see table) have been classified into several categories, including the ATR-ATRIP kinase complex (Rad3-Rad26), the RFC- and PCNA-like complexes (Rad1, Rad9, Hus1 and

Rad17), the mediator proteins (Crb2 and Mrc1) and the effector kinases (Chk1 and Cds1).

In fission yeast, the ATR-ATRIP complex (Rad3-Rad26) phosphorylates many of the other checkpoint proteins, and these events are central to the checkpoint response. Rad3-dependent Chk1 and Cds1 phosphorylation is essential for checkpoint activation (Rhind and Russell, 2000). Rad17, together with RFC2-RFC5, forms a replication-factor-C-like complex and is thought to load a PCNA-like Rad1-Hus1-Rad9 complex onto damaged DNA (Caspari and Carr, 2002). This complex may link Rad3-Rad26 to the mediator complexes, which in turn bring Chk1 and Cds1 into proximity. Different mediator complexes function in S phase and G2 phase. In S phase, Mrc1 mediates

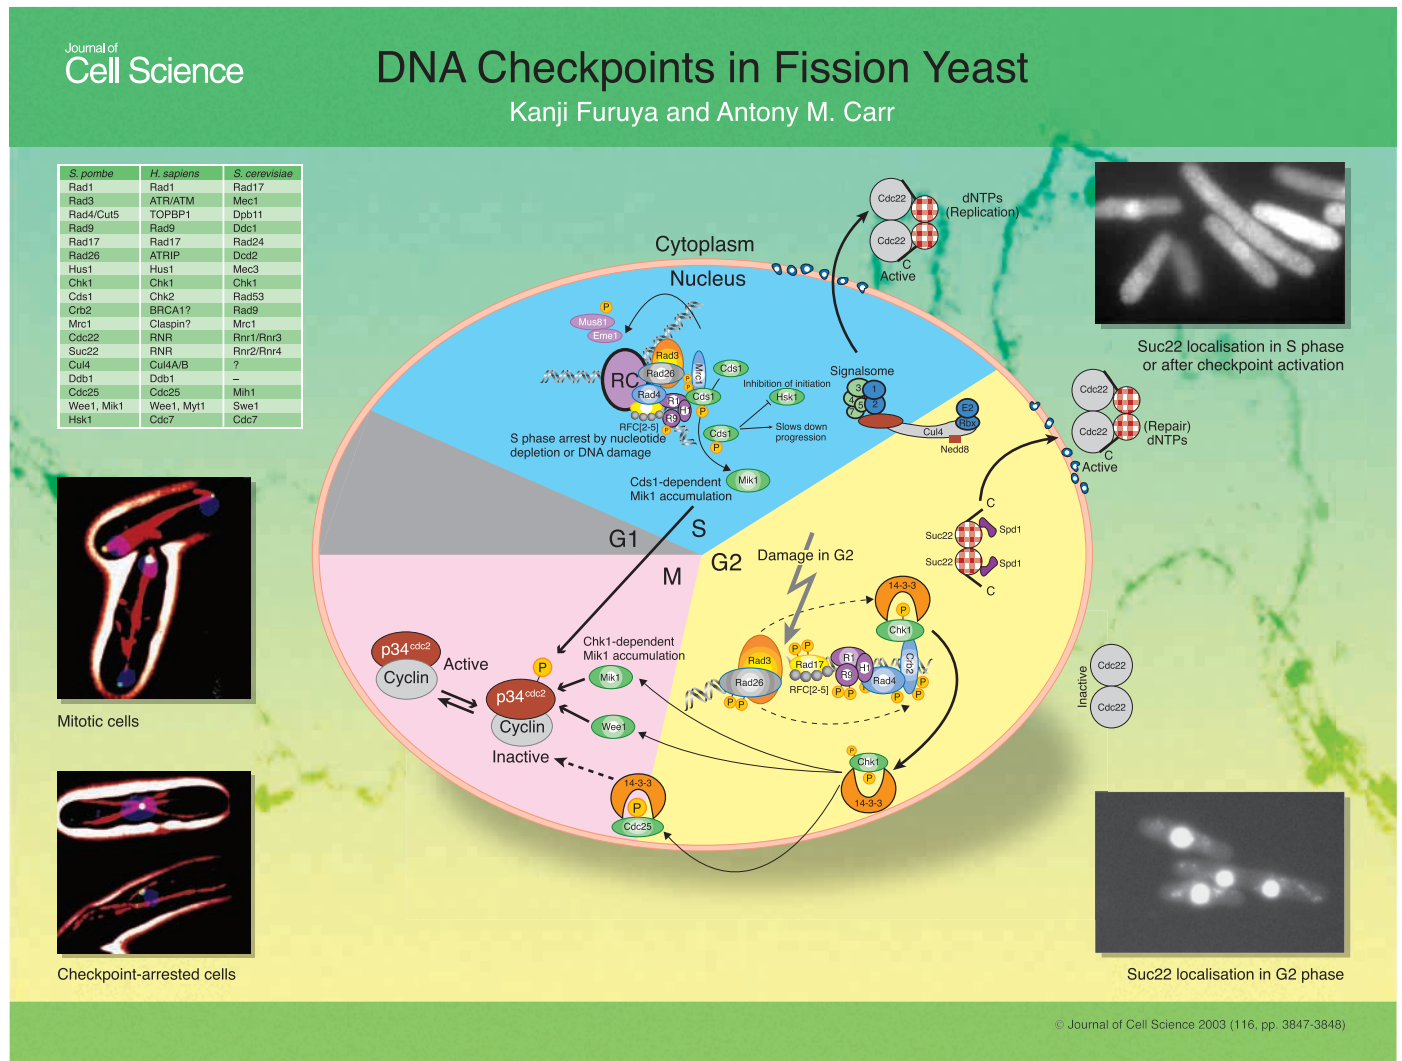

Cds1-dependent checkpoint signaling. Activation of Cds1 kinase results in Mik1 accumulation. Mik1 phosphorylates Tyr15 of Cdc2, thus preventing mitosis. Importantly, the Mrc1/Cds1 module has additional roles in the S phase response, such as stabilizing stalled replication forks and inhibiting late-firing replication origins. It also regulates the Mus81-Eme1 endonuclease complex, which was identified through its interaction with the Cds1 fork-head-associated (FHA) domain (Boddy et al., 2000). In G2 phase, Crb2 mediates Chk1-dependent checkpoint signaling. Activated Chk1 results in activation of Mik1 and Wee1 Cdc2 Tyr15 kinases and may inactivate Cdc25 tyrosine phosphatase (O'Connell et al., 2000).

Chk1 is also involved in regulating dNTP synthesis (Liu et al., 2003). Chk1 activation in G2 induces degradation of

the Spd1 protein. Spd1 behaves as an inhibitor of ribonucleotide reductase (RNR). Its ubiquitin-dependent degradation is necessary for nuclear export of Suc22 (the small subunit of RNR) during DNA replication in S phase (upper right) and DNA repair in G2 phase. Suc22, which normally localizes to the nucleus in G2 phase cells (bottom right) and the whole cell during normal S phase, presumably forms an active complex with cytoplasmic Cdc22 during DNA replication and in response to checkpoint activation to provide nucleotides for DNA repair. The signalosome complex promotes ubiquitin-dependent degradation of Spd1. The signalosome forms a complex together with the Pcu4 (cullin 4) E3 ubiquitin ligase.

## References

Boddy, M. N., Lopez-Girona, A., Shanahan, P.,

Interthal, H., Heyer, W. D. and Russell, P. (2000). Damage tolerance protein Mus81 associates with the FHA1 domain of checkpoint kinase Cds1. *Mol. Cell Biol.* **20**, 8758-8766.

Caspari, T. and Carr, A. M. (2002). Checkpoints: how to flag up double-strand breaks. *Curr. Biol.* **12**, R105-R107.

Liu, C., Powell, K. A., Mundt, K., Wu, L., Carr, A. M. and Caspari, T. (2003). Cop9/signalosome subunits and Pcu4 regulate ribonucleotide reductase by both checkpoint-dependent and -independent mechanisms. *Genes Dev.* **17**, 1130-1140.

O'Connell, M. J., Walworth, N. C. and Carr, A. M. (2000). The G2-phase DNA-damage checkpoint. *Trends Cell Biol.* **10**, 296-303.

Rhind, N. and Russell, P. (2000). Checkpoints: it takes more than time to heal some wounds. *Curr. Biol.* **10**, R908-R911.

### Cell Science at a Glance on the Web

Electronic copies of the poster insert are available in the online version of this article at [jcs.biologists.org](http://jcs.biologists.org). The JPEG images can be downloaded for printing or used as slides.

## Cell Science at a Glance

Cell Science at a Glance is included as a poster in the paper copy of the journal and available in several downloadable formats in the online version, which we encourage readers to download and use as slides. Future contributions to this section will include signalling pathways, phylogenetic trees, multiprotein complexes, useful reagents . . . and much more.

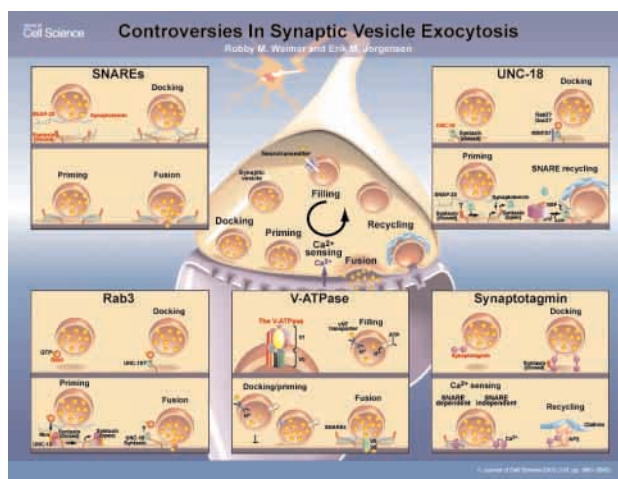

Synaptic vesicle exocytosis (September 2003)

We would like to encourage readers to submit ideas for future contributions to this section. Potential Cell Science at a Glance articles should be addressed to the Executive Editor and sent to

Journal of Cell Science, 140 Cowley Rd, Cambridge, CB4 0DL, UK.
